# Supplementary material for: Biomass-derived carbonaceous positive electrodes for sustainable lithium-ion storage
Source: Royal Society of Chemistry journal article supplement (doi:10.1039/c5nr07064c), 2016-01-01
Supplement: c5nr07064c1.pdf [file c5nr07064c1.pdf]

# Biomass-Derived Carbonaceous Positive Electrodes for Sustainable Lithium-Ion Storage

*Tianyuan Liu,<sup>a</sup> Reza Kaviani,<sup>a</sup> Zhongming Chen,<sup>b</sup> Samuel S Cruz,<sup>a</sup> Suguru Noda,<sup>b</sup> Seung Woo Lee<sup>a,\*</sup>*

a. George W. Woodruff School of Mechanical Engineering, Georgia Institute of Technology  
Atlanta, Georgia 30332, United States

b. Department of Applied Chemistry, Waseda University, 3-4-1 Okubo, Shinjuku-ku, Tokyo  
169-8555, Japan

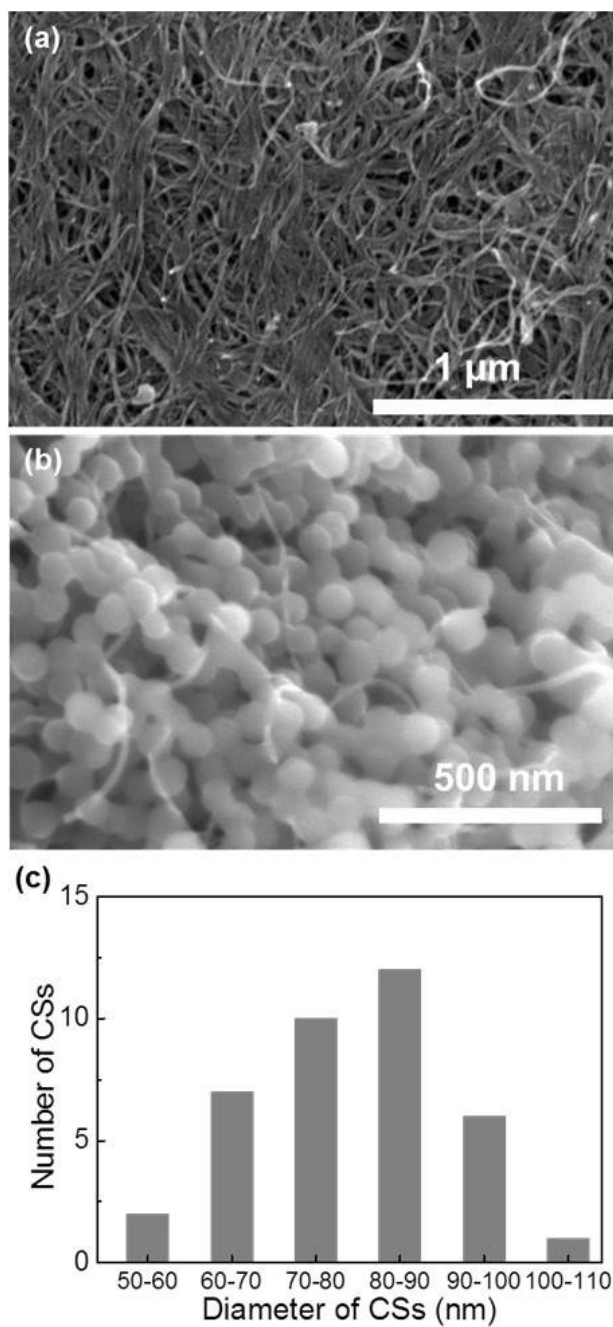

Figure S1. SEM images of (a) the pristine few-walled carbon nanotube (FWNT) film after the microwave process and (b) the composite film including 68 wt% of carbon spheres (CS-0.68). (c) A histogram of the diameter of the carbon spheres, which was analyzed by SEM. The average diameter is  $79.9 \pm 11.9$  nm by counting 38 carbon spheres.

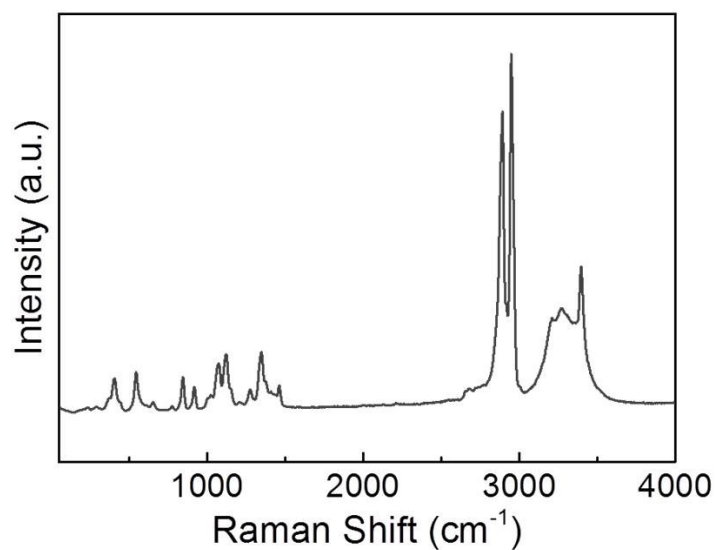

Figure S2. (a) Raman spectrum of glucose in the range of 50-4000 cm<sup>-1</sup>. A broad plateau between 3100 and 3500 cm<sup>-1</sup> is associated with bonded hydroxyl groups, while superimposed three sharp peaks above 3200 cm<sup>-1</sup> are ascribed to non-hydrogen-bonded hydroxyl groups.<sup>1</sup> Two sharp peaks between 2800 and 3000 cm<sup>-1</sup> can be assigned to C-H symmetric and asymmetric stretching.<sup>[1]</sup> A complex series of sharp peaks below 1200 cm<sup>-1</sup> are due to the vibration of the C-O, C-C, and C-O-H groups <sup>[1]</sup>

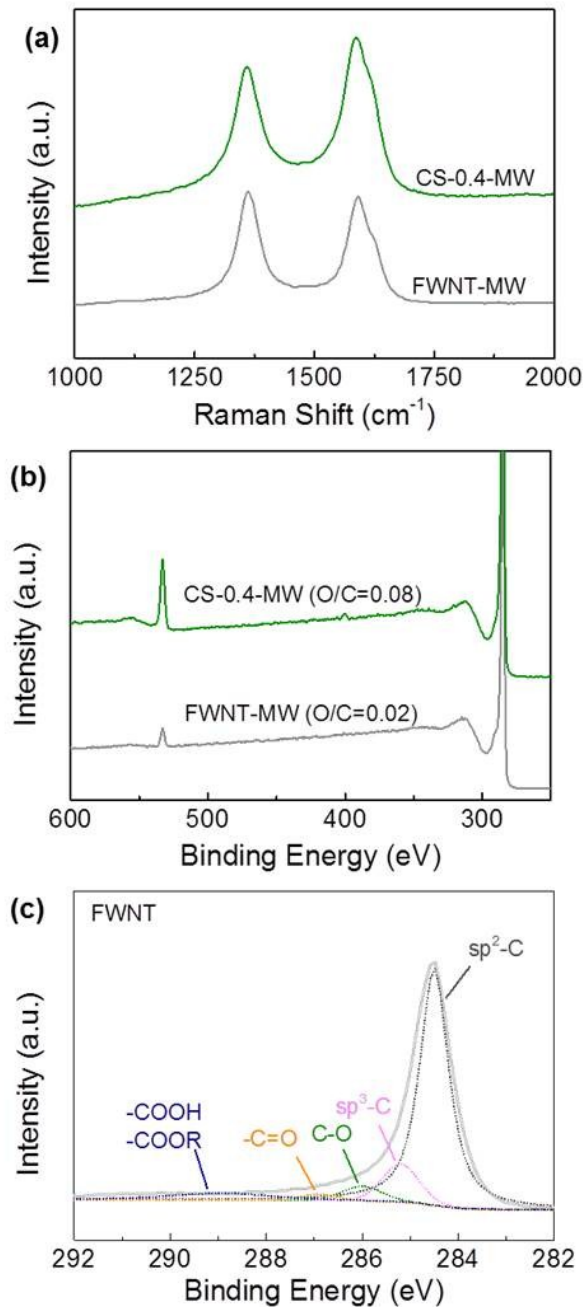

Figure S3. (a) Raman spectra, (b) X-ray photoelectron spectroscopy (XPS) wide scan survey of the microwave processed FWNT film and the CS-0.4-MW. (c) High resolution  $\text{C}1\text{s}$  spectra of pristine FWNTs.

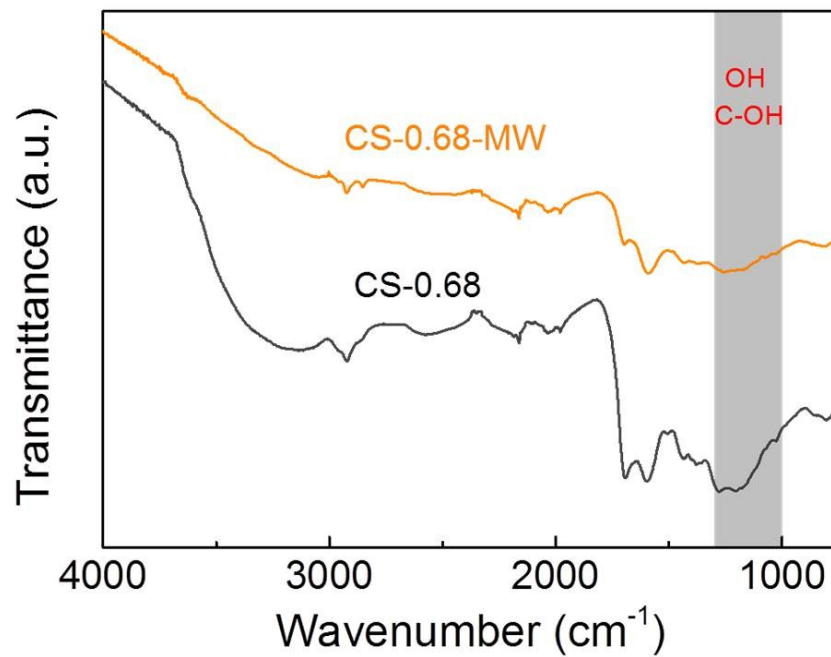

Figure S4. (a) Fourier transform infrared (FTIR) spectroscopy comparison of the composite films before (CS-0.68) and after (CS-0.68-MW) microwave process.

Table S1. Densities and electrical conductivities of the pristine FWNT and composite films.

| <b>Sample</b> | <b>Density (g/cm<sup>3</sup>)</b> | <b>Electrical Conductivity (Scm<sup>2</sup>/g)</b> |
|---------------|-----------------------------------|----------------------------------------------------|
| FWNT          | 0.24                              | 209.2                                              |
| FWNT-MW       | 0.20                              | 183                                                |
| CS-0.4        | 0.37                              | 93                                                 |
| CS-0.4-MW     | 0.34                              | 93.8                                               |
| CS-0.68       | 0.41                              | 64.4                                               |
| CS-0.68-MW    | 0.35                              | 75.7                                               |

Table S2. Capacity comparison of various carbon based positive electrodes.

| <b>Sample</b>                      | <b>Voltage Window (V)</b> | <b>Capacity (mAh/g)</b> | <b>Reference</b>                                         |
|------------------------------------|---------------------------|-------------------------|----------------------------------------------------------|
| Activated Carbon                   | 3.05 - 4.3 V              | 38.4                    | <i>J. Power Sources</i> <b>2015</b> , 282, 385-393       |
| Activated Carbon                   | 3 - 4.6 V                 | 5 - 71                  | <i>Sci. Rep.</i> <b>2013</b> , 3, 3002                   |
| Oxidized FWNT                      | 1.5 – 4.5 V               | 87 – 118                | <i>Energy Environ. Sci.</i> , <b>2012</b> , 5, 5437-5444 |
| Reduced Graphene Oxide (rGO)       | 1.5-4.5                   | 125                     | <i>ACS Appl. Mater. Interfaces</i> 2013, 5,              |
| Multi-walled carbon nanotube+rGO   | 1.5 – 4.5 V               | 110-135                 | <i>Adv. Funct. Mater.</i> <b>2013</b> , 23, 1037–1045    |
| <i>folded</i> -graphene film (fGF) | 1.5 – 4.5 V               | 160                     | <i>Chem. Mater.</i> , <b>2015</b> , 27, 3291–3298        |
| Functionalized Graphene            | 1.5 – 4.5 V               | 102 - 165               | <i>J. Phys. Chem. Lett.</i> <b>2014</b> , 5, 4324–4330   |

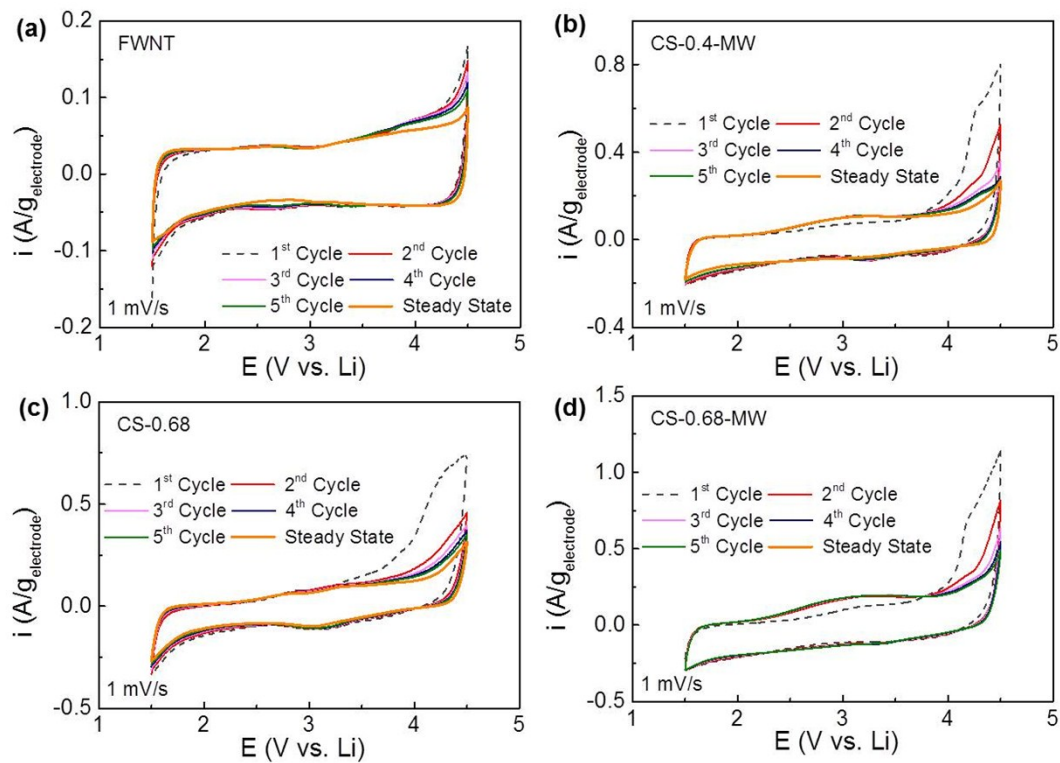

Figure S5. CV scans of (a) the pristine FWNTs electrode, (b) CS-0.4-MW, (c) CS-0.68, and (d) CS-0.68-MW as a function of cycle number.



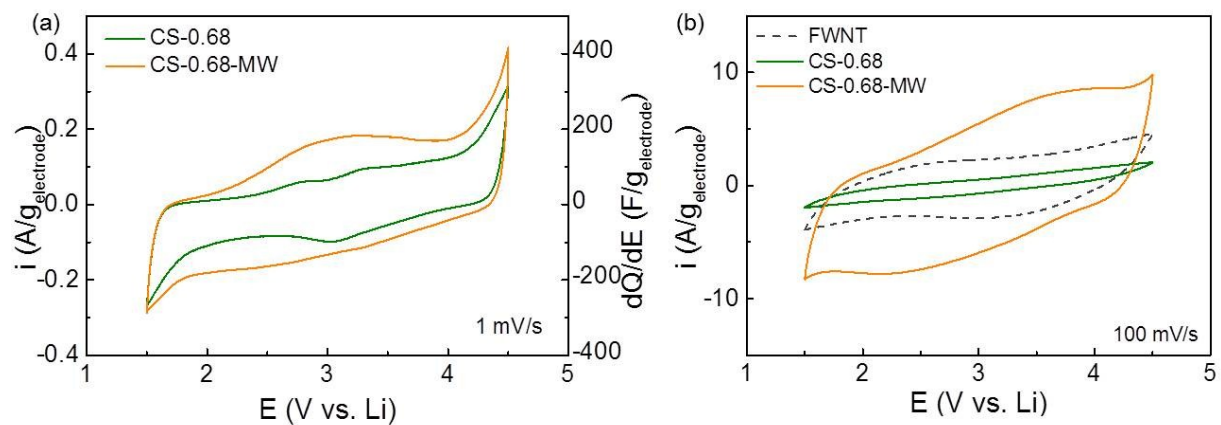

Figure S6. Comparison of steady state CV scans before (CS-0.68, olive) and after (CS-0.68-MW, orange) microwave process at (a) 1 mV/s and (b) 100 mV/s. A CV scan of the FWNT electrode was compared as control at Figure S6b.

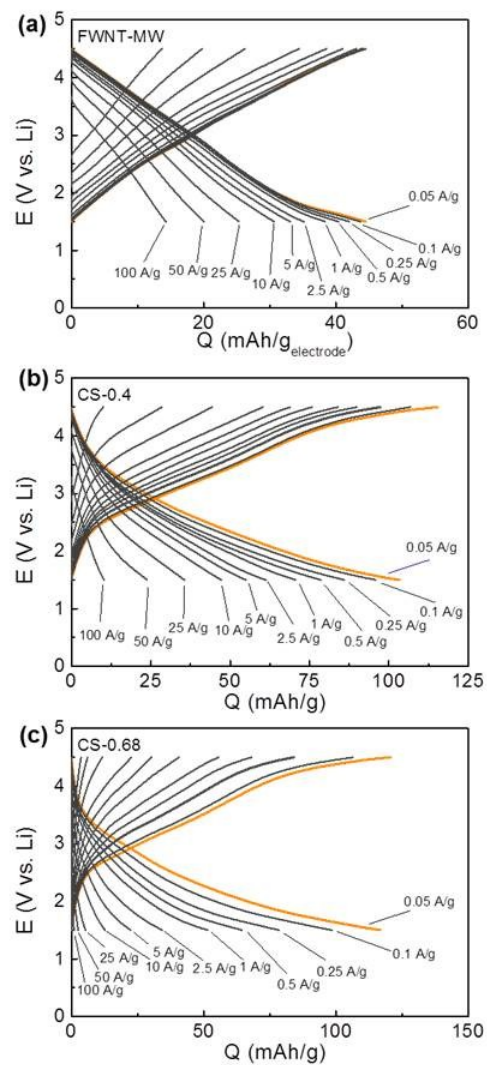

Figure S7. Rate-dependent galvanostatic charge and discharge curves for (a) the microwave processed FWNT film (FWNT-MW), (b) CS-0.4, and (c) CS-0.68 in lithium cells.

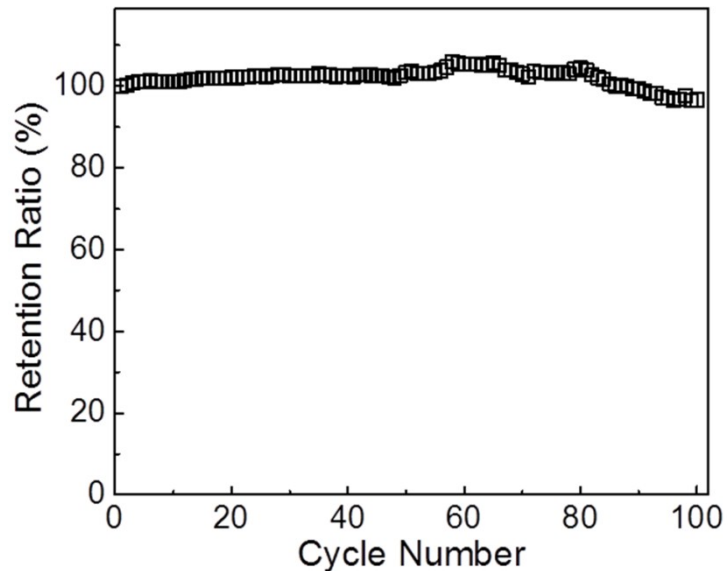

Figure S8. Cycling stability of CS-0.68-MW at a current density of 0.1 A/g up to 100 cycles.

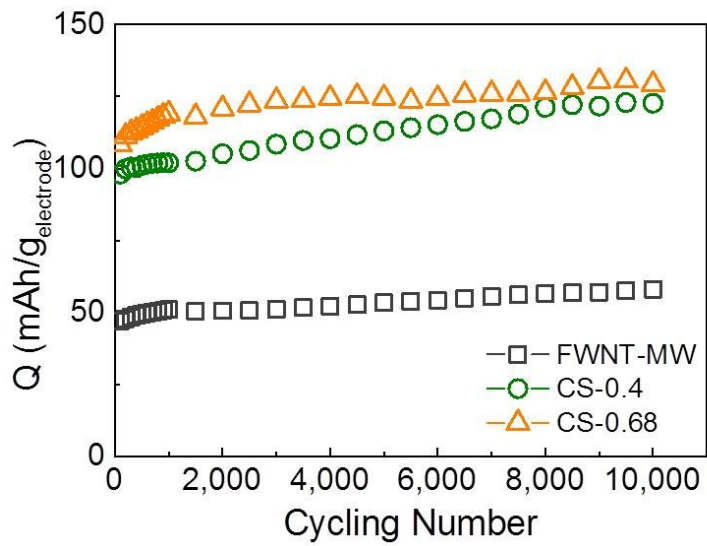

Figure S9. Specific capacities of the FWNT-MW, CS-0.4 and CS-0.68 as a function of cycle number up to 10,000 cycles using an accelerating cycling method. Data points indicate specific discharge capacities of the films measured at a slow rate of 0.1 A/g. Between each slow measurement, the cells were cycled at high current density of 10 A/g.

**References:**

1.

[http://www.mccroneatlas.com/viewer/text.asp?IMAGE\\_ID=231417&PARTICLE\\_ID=71&TECHNIQUE\\_ID=5&MODE=RAMAN](http://www.mccroneatlas.com/viewer/text.asp?IMAGE_ID=231417&PARTICLE_ID=71&TECHNIQUE_ID=5&MODE=RAMAN).
